# Supplementary material for: Factors associated with high 24-month persistence with denosumab: results of a real-world, non-interventional study of women with postmenopausal osteoporosis in Germany, Austria, Greece, and Belgium
Source: Springer Nature journal article supplement (doi:10.1007/s11657-017-0351-2), 2017-06-22
Supplement: MOESM1 [file 11657_2017_351_MOESM1_ESM.pdf]

**Factors associated with high 24-month persistence with denosumab: results of a real-world, non-interventional study of women with postmenopausal osteoporosis in Germany, Austria, Greece, and Belgium**

A. Fahrleitner-Pammer<sup>1</sup> · N. Papaioannou<sup>2</sup> · E. Gielen<sup>3</sup> · M. Feudjo Tepie<sup>4</sup> · C. Toffis<sup>5</sup> · I. Frieling<sup>6</sup> · P. Geusens<sup>7</sup> · P. Makras<sup>8</sup> · E. Boschitsch<sup>9</sup> · J. Callens<sup>10</sup> · A. D. Anastasilakis<sup>11</sup> · C. Niedhart<sup>12</sup> · H. Resch<sup>13</sup> · L. Kalouche-Khalil<sup>14</sup> · P. Hadji<sup>15</sup>

<sup>1</sup>Department of Endocrinology and Metabolism, Medical University Graz, Graz, Austria

<sup>2</sup>University of Athens, Medical School, Laboratory for the Research of Musculoskeletal System, KAT Hospital, Athens, Greece

<sup>3</sup>Department of Geriatrics and Center for Metabolic Bone Diseases, UZ Leuven, Leuven, Belgium

<sup>4</sup>Amgen Ltd, Uxbridge, UK

<sup>5</sup>Amgen Ltd, Cambridge, UK

<sup>6</sup>Osteoporosis Center, Hamburg, Germany

<sup>7</sup>Department of Internal Medicine, Maastricht University Medical Centre, Maastricht, Netherlands and University Hasselt, Diepenbeek, Belgium

<sup>8</sup>Department of Endocrinology and Diabetes, 251 Hellenic Airforce and VA General Hospital, Athens, Greece

<sup>9</sup>Ambulatorium KLIMAX, Menopause and Osteoporosis Clinic, Vienna, Austria

<sup>10</sup>Department of Orthopedics, Rheumatology and Physical Medicine and Rehabilitation, AZ Zeno Knokke, Belgium

<sup>11</sup>Department of Endocrinology, 424 General Military Hospital, Thessaloniki, Greece

<sup>12</sup>Osteoporosis Center, Heinsberg, Germany

<sup>13</sup>Medical Department II, St Vincent Hospital, Academic Teaching Hospital of the Medical University of Vienna, Vienna, Austria and Medical Faculty, Sigmund Freud University, Vienna, Austria

<sup>14</sup>Amgen (Europe) GmbH, Zug, Switzerland

<sup>15</sup>Department of Obstetrics and Gynecology, Krankenhaus Nordwest, Frankfurt, Germany

**Corresponding author:**

P. Hadji

Department of Obstetrics and Gynecology, Krankenhaus Nordwest, Frankfurt, Germany

**Journal:** *Osteoporosis International*

## Electronic Supplementary Material

### Online Resource 1 Covariates entered into the multivariable analysis model and statistically significant associations with 24-month persistence

| Covariate                                                                     | Country                        |                                   |                                   |                                |
|-------------------------------------------------------------------------------|--------------------------------|-----------------------------------|-----------------------------------|--------------------------------|
|                                                                               | Germany                        | Austria                           | Greece                            | Belgium                        |
| Age                                                                           |                                |                                   | <u><math>p &lt; 0.0001</math></u> |                                |
| Currently smoking                                                             |                                |                                   | <u><math>p = 0.0246</math></u>    |                                |
| Formerly smoking                                                              |                                |                                   | $p = 0.1776$                      |                                |
| Modified Wolfe comorbidity index                                              | <u><math>p = 0.0481</math></u> | $p = 0.0541$                      |                                   |                                |
| Any chronic medical condition                                                 | <u><math>p = 0.0065</math></u> |                                   |                                   |                                |
| Number of concomitant medications taken at baseline                           |                                |                                   | $p = 0.1596$                      |                                |
| ≥1 fall in the 12 months prior to enrollment                                  | <u><math>p = 0.0381</math></u> |                                   | $p = 0.2133$                      | <u><math>p = 0.0269</math></u> |
| ≥2 historical fractures                                                       |                                | $p = 0.0525$                      |                                   |                                |
| History of hip fracture                                                       |                                |                                   | $p = 0.0838$                      |                                |
| ≥1 occurrence of immobility in the 12 months prior to enrollment              |                                | <u><math>p = 0.0193</math></u>    |                                   |                                |
| Previous PMO therapy in the 12 months before enrollment                       |                                |                                   | $p = 0.0751$                      |                                |
| History of discontinuation of osteoporosis therapy (not calcium or vitamin D) |                                |                                   | $p = 0.1940$                      |                                |
| Reason for prescribing: failed other available osteoporosis therapy           | $p = 0.1259$                   |                                   | <u><math>p = 0.0330</math></u>    |                                |
| Reason for prescribing: intolerant to other osteoporosis therapy              |                                |                                   | $p = 0.1063$                      |                                |
| Reason for prescribing: multiple risk factors for fracture                    | $p = 0.0999$                   | $p = 0.1633$                      |                                   |                                |
| Reminder service available                                                    |                                | <u><math>p = 0.0179</math></u>    | <u><math>p = 0.0058</math></u>    |                                |
| Academic center                                                               | <u><math>p = 0.0105</math></u> | <u><math>p = 0.0038</math></u>    |                                   | <u><math>p = 0.0015</math></u> |
| Employment status                                                             |                                |                                   | $p = 0.1495$                      |                                |
| Center type                                                                   | $p = 0.0681$                   |                                   |                                   |                                |
| Proximity to clinic (minutes)                                                 |                                |                                   |                                   | $p = 0.1266$                   |
| Region                                                                        | $p = 0.1721$                   |                                   |                                   |                                |
| Cause of menopause                                                            |                                | $p = 0.1119$                      |                                   |                                |
| Physician sex                                                                 |                                | $p = 0.1320$                      | <u><math>p = 0.0491</math></u>    |                                |
| Physician specialty                                                           | $p = 0.0991$                   | <u><math>p &lt; 0.0001</math></u> |                                   | <u><math>p = 0.0492</math></u> |
| Physician years of practice                                                   |                                | <u><math>p = 0.0161</math></u>    | $p = 0.0580$                      |                                |
| Prior calcium and/or vitamin D supplements                                    |                                | $p = 0.1047$                      | $p = 0.0610$                      |                                |

*P* values show the statistical significance of the covariate in the country-specific model, with *p* values <0.05 considered to be significant (shown underlined). Covariates in bold text were considered to be clinically relevant

PMO postmenopausal osteoporosis

Key shown below

|  |                                                                    |  |                                                              |
|--|--------------------------------------------------------------------|--|--------------------------------------------------------------|
|  | Covariate not eligible for inclusion in the country-specific model |  | Covariate significantly associated with 24-month persistence |
|  | Covariate not significantly associated with 24-month persistence   |  |                                                              |

**Online Resource 2** MCR of denosumab at 24 months

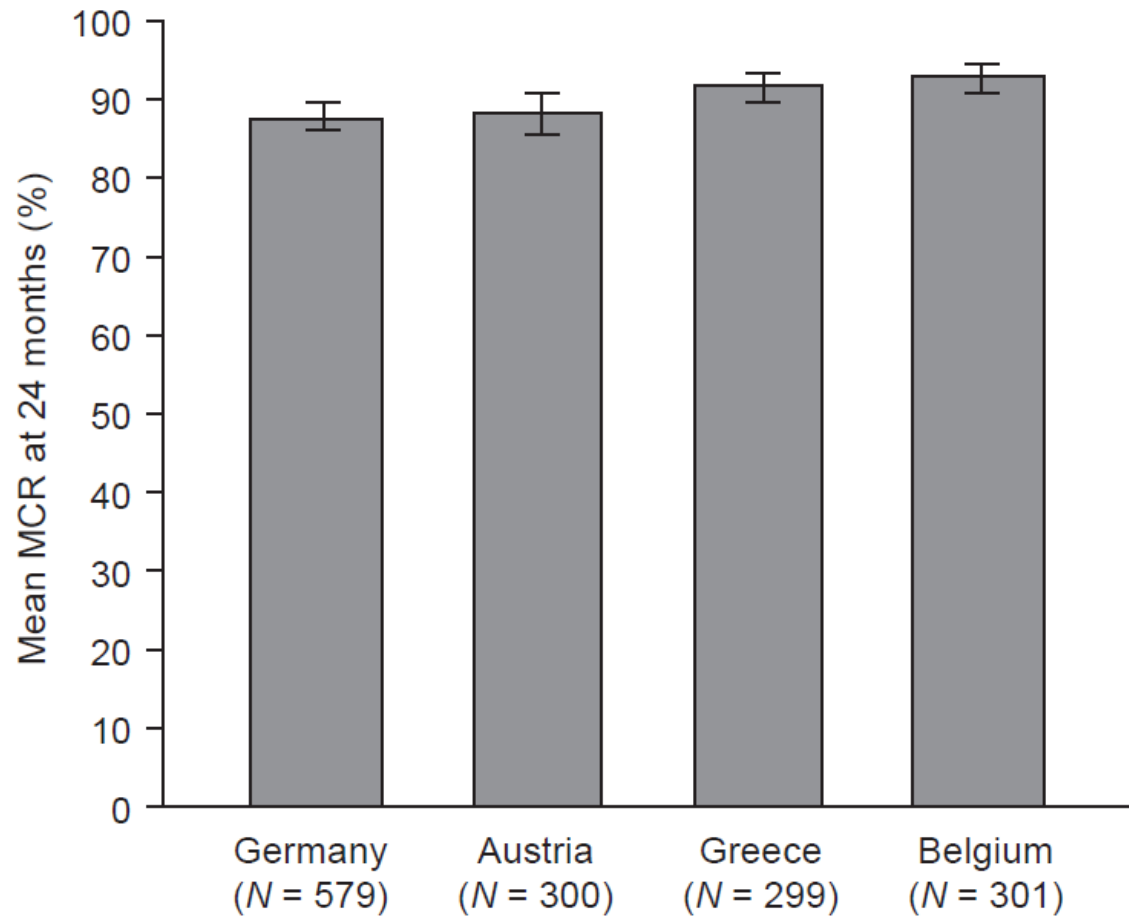

Data are shown as mean percentages  $\pm$  95 % CIs

The MCR was calculated as the percentage of time that a patient was covered by denosumab, as assessed from prescription records, and was based on the assumption that each injection of denosumab provides 6 months of medication coverage

*CI* confidence interval, *MCR* medication coverage ratio

**Online Resource 3** Sensitivity analysis of persistence and adherence with denosumab at 24 months

|                       | Germany<br>(N = 579) | Austria<br>(N = 300) | Greece<br>(N = 299) | Belgium<br>(N = 301) |
|-----------------------|----------------------|----------------------|---------------------|----------------------|
| <b>Persistence, %</b> |                      |                      |                     |                      |
| 6 months + 4 weeks    | 65.3 (61.3–69.2)     | 69.3 (63.8–74.5)     | 72.6 (67.1–77.6)    | 76.4 (71.2–81.1)     |
| 6 months + 6 weeks    | 72.2 (68.4–75.8)     | 78.0 (72.9–82.6)     | 79.3 (74.2–83.7)    | 81.7 (76.9–85.9)     |
| 6 months + 12 weeks   | 77.4 (73.7–80.7)     | 82.0 (77.2–86.2)     | 86.6 (82.2–90.3)    | 87.7 (83.5–91.2)     |
| <b>Adherence, %</b>   |                      |                      |                     |                      |
| 6 months ± 6 weeks    | 71.2 (67.3–74.8)     | 77.0 (71.8–81.6)     | 78.6 (73.5–83.1)    | 79.7 (74.7–84.1)     |
| 6 months ± 8 weeks    | 74.8 (71.0–78.3)     | 79.7 (74.7–84.1)     | 81.9 (77.1–86.1)    | 85.0 (80.5–88.9)     |
| 6 months ± 12 weeks   | 77.2 (73.6–80.6)     | 82.0 (77.2–86.2)     | 86.6 (82.2–90.3)    | 87.0 (82.7–90.6)     |

Data are shown as percentages (95 % confidence intervals)
